# Supplementary material for: TCMIP v2.0 Powers the Identification of Chemical Constituents Available in Xinglou Chengqi Decoction and the Exploration of Pharmacological Mechanisms Acting on Stroke Complicated With Tanre Fushi Syndrome
Source: Front Pharmacol. 2021 Jul 15;12:598200. doi: 10.3389/fphar.2021.598200 (PMC8320350; doi:10.3389/fphar.2021.598200)
Supplement: Supplementary file 3 [file Table1.XLSX]

## Sheet: GL
Name	01 number	05 Chinese name	06 English name	07 Formula	08 Molecular weight	09 CAS number	10 2D structure	22 Literature resources	11 Physicochemical property	12 Pharmacology	13 Retention time	15 Exact molecular weight	16 Error	17 Fragments	18 Existence form	23 ALogP	24 LogD	25 Molecular_Solubility	26 Molecular_Volume	27 Molecular_SurfaceArea	28 Molecular_PolarSurfaceArea	29 Num_RotatableBonds	30 Num_H_Acceptors	31 Num_H_Donors	32 ADMET_Absorption_Level	33 ADMET_BBB_Level	34 ADMET_BBB	35 ADMET_Solubility_Level	36 ADMET_Solubility	37 ADMET_Hepatotoxicity	38 ADMET_Hepatotoxicity_Probability	39 ADMET_CYP2D6	40 ADMET_CYP2D6_Probability	41 ADMET_PPB_Level
瓜蒌		赖氨酸	lysine	C6H14N2O2	146.19	56-87-1	lysine.mol	10.13422/j.cnki.syfjx.20181715				146.106
瓜蒌		精氨酸	arginine	C6H14N4O2	174.204	74-79-3	arginine.mol	10.13422/j.cnki.syfjx.20181715				174.112
瓜蒌		天冬氨酸	Aspartic acid	C4H7NO4	133.103	56-84-8	Aspartic acid.mol	10.13422/j.cnki.syfjx.20181715				133.038
瓜蒌		组氨酸	histidine	C6H9N3O2	155.157	71-00-1	histidine.mol	10.13422/j.cnki.syfjx.20181715				155.069
瓜蒌		谷氨酸	Glutamic acid	C5H9NO4	147.13	56-86-0	Glutamic acid.mol	10.13422/j.cnki.syfjx.20181715				147.053
瓜蒌		苯丙氨酸	phenylalanine	C9H11NO2	165.192	63-91-2	phenylalanine.mol	10.13422/j.cnki.syfjx.20181715				165.079
瓜蒌		亮氨酸	leucine	C6H13NO2	131.175	61-90-5	leucine.mol	10.13422/j.cnki.syfjx.20181715				131.095
瓜蒌		异亮氨酸	isoleucine	C6H13NO2	131.175	73-32-5	isoleucine.mol	10.13422/j.cnki.syfjx.20181715				131.095
瓜蒌		丙氨酸	alanine	C3H7NO2	89.094	56-41-7	alanine.mol	10.13422/j.cnki.syfjx.20181715				89.0477
瓜蒌		蛋氨酸	methionine	C5H11NO2S	149.208	63-68-3	methionine.mol	10.13422/j.cnki.syfjx.20181715				149.051
瓜蒌		缬氨酸	Valine	C5H11NO2	117.148	72-18-4	Valine.mol	10.13422/j.cnki.syfjx.20181715				117.079
瓜蒌		络氨酸	Tyrosine	C9H11NO3	181.191	60-18-4	Tyrosine.mol	10.13422/j.cnki.syfjx.20181715				181.074
瓜蒌		苏氨酸	threonine	C4H9NO3	119.12	72-19-5	threonine.mol	10.13422/j.cnki.syfjx.20181715				119.058
瓜蒌		焦谷氨酸	pyroglutamic acid	C5H7NO3	129.115	98-79-3	pyroglutamic acid.mol	10.13422/j.cnki.syfjx.20181715				129.043
瓜蒌		烟酸	nicotinic acid	C6H5NO2	123.111	59-67-6	nicotinic acid.mol	10.13422/j.cnki.syfjx.20181715				123.032
瓜蒌		4-羟基-烟酸	4-hydroxy-nicotinic acid	C6H5NO3	139.11	609-70-1	4-hydroxy-nicotinic acid.mol	10.13422/j.cnki.syfjx.20181715				139.027
瓜蒌		琥珀酸	succinic acid	C4H6O4	118.088	110-15-6	succinic acid.mol	10.13422/j.cnki.syfjx.20181715				118.027
瓜蒌		天师酸	tianshic acid	C18H34O5	330.465		tianshic acid.mol	10.13422/j.cnki.syfjx.20181715				330.241
瓜蒌		丁酸	butyric acid	C4H8O2	88.106	107-92-6	butyric acid.mol	10.13422/j.cnki.syfjx.20181715				88.0524
瓜蒌		香草酸	vanillic acid	C8H8O4	168.148	121-34-6	vanillic acid.mol	10.13422/j.cnki.syfjx.20181715				168.042
瓜蒌		异香草酸	isovanillic acid	C8H8O4	168.148	645-08-9	isovanillic acid.mol	10.13422/j.cnki.syfjx.20181715				168.042
瓜蒌		己酸	Caproic Acid	C6H12O2	116.16	142-62-1	Caproic Acid.mol	10.13422/j.cnki.syfjx.20181715				116.084
瓜蒌		癸酸	Decanoic Acid	C10H20O2	172.268	334-48-5	Decanoic Acid.mol	10.13422/j.cnki.syfjx.20181715				172.146
瓜蒌		4-羟基-2-甲氧基-苯甲酸	4-hydroxy-2-methoxy-benzoic acid	C8H8O4	168.148	90111-34-5	4-hydroxy-2-methoxy-benzoic acid.mol	10.13422/j.cnki.syfjx.20181715				168.042
瓜蒌		亚油酸	linoleic acid	C18H32O2	280.452	60-33-3	linoleic acid.mol	10.13422/j.cnki.syfjx.20181715				280.24
瓜蒌		棕榈酸	palmitic acid	C16H32O2	256.43	0057-10-3	palmitic acid.mol	10.13422/j.cnki.syfjx.20181715				256.24
瓜蒌		肉豆蔻酸	myristic acid	C14H28O2	228.376	544-63-8	myristic acid.mol	10.13422/j.cnki.syfjx.20181715				228.209
瓜蒌		油酸	oleic acid	C18H34O2	282.468	112-80-1	oleic acid.mol	10.13422/j.cnki.syfjx.20181715				282.256
瓜蒌		香草酸-4-O-β-D-葡萄糖苷	vanillic acid-4-O-β-D-glucopyranoside	C14H18O9	330.289		vanillic acid-4-O-β-D-glucopyranoside.mol	10.13422/j.cnki.syfjx.20181715				330.095
瓜蒌		月桂酸	Lauric Acid	C12H24O2	200.322	143-07-7	Lauric Acid.mol	10.13422/j.cnki.syfjx.20181715				200.178
瓜蒌		亚麻酸	Linolenic Acid	C18H30O2	278.436	463-40-1	Linolenic Acid.mol	10.13422/j.cnki.syfjx.20181715				278.225
瓜蒌		壬酸	Nonanoicacid	C22H23NO7	413.426	128-62-1	Nonanoicacid.mol	10.13422/j.cnki.syfjx.20181715				413.147
瓜蒌		硬脂酸	Stearic Acid	C18H36O2	284.484	21128	Stearic Acid.mol	10.13422/j.cnki.syfjx.20181715				284.272
瓜蒌		棕榈油酸	Palmitoleic Acid	C16H30O2	254.414	373-49-9	Palmitoleic Acid.mol	10.13422/j.cnki.syfjx.20181715				254.225
瓜蒌		瓜蒌萜二醇	karounidiol	C30H48O2	440.712	118117-31-0	karounidiol.mol	10.13422/j.cnki.syfjx.20181715				440.365
瓜蒌		3，29-二苯甲基-瓜蒌二醇	3,29-dibenzoyl-karounitriol	C44H58O5	666.943		3,29-dibenzoyl-karounitriol.mol	10.13422/j.cnki.syfjx.20181715				666.428
瓜蒌		5-脱氢瓜蒌二醇	5-dehydrokarounidiol	C30H46O2	438.696		5-dehydrokarounidiol.mol	10.13422/j.cnki.syfjx.20181715				438.35
瓜蒌		异瓜蒌二醇	isokarounidiol	C30H48O2	440.712		isokarounidiol.mol	10.13422/j.cnki.syfjx.20181715				440.365
瓜蒌		7-氧二氢瓜蒌二醇	7-oxodihydrokarounidiol	C30H48O3	456.711	143183-47-5	7-oxodihydrokarounidiol.mol	10.13422/j.cnki.syfjx.20181715				456.36
瓜蒌		复合精油醇	multiflorenol	C30H50O	426.729	2270-62-4	multiflorenol.mol	10.13422/j.cnki.syfjx.20181715				426.386
瓜蒌		异复合精油醇	isomultiflorenol	C30H50O	426.729	24462-48-4	isomultiflorenol.mol	10.13422/j.cnki.syfjx.20181715				426.386
瓜蒌			3-epibryonolol	C30H50O2	442.728		3-epibryonolol.mol	10.13422/j.cnki.syfjx.20181715				442.381
瓜蒌			bryonolol	C30H50O2	442.728	39765-50-9	bryonolol.mol	10.13422/j.cnki.syfjx.20181715				442.381
瓜蒌		泻根醇酸	bryonolic acid	C30H48O3	456.711	24480-44-2	bryonolic acid.mol	10.13422/j.cnki.syfjx.20181715				456.36
瓜蒌		环己二醇	cyclokirilodiol	C30H50O3	458.727	188725-44-2	cyclokirilodiol.mol	10.13422/j.cnki.syfjx.20181715				458.376
瓜蒌		异环己二醇	isocyclokirilodiol	C30H50O3	458.727		isocyclokirilodiol.mol	10.13422/j.cnki.syfjx.20181715				458.376
瓜蒌		10α-葫芦-5,24-二烯-3β-醇	10α-cucurbita-5,24-dien-3β-ol	C30H50O	426.729		10α-cucurbita-5,24-dien-3β-ol.mol	10.13422/j.cnki.syfjx.20181715				426.386
瓜蒌		7-氧代-10α-葫芦巴二烯醇	7-oxo-10α-cucurbitadienol	C30H48O2	440.712		7-oxo-10α-cucurbitadienol.mol	10.13422/j.cnki.syfjx.20181715				440.365
瓜蒌			arvenin I	C38H56O13	720.853	65247-27-0	arvenin I.mol	10.13422/j.cnki.syfjx.20181715				720.372
瓜蒌			arvenin Ⅲ	C36H54O12	678.816	65597-45-7	arvenin Ⅲ.mol	10.13422/j.cnki.syfjx.20181715				678.362
瓜蒌		葫芦素B	cucurbitacin B	C32H46O8	558.712	6199-67-3	cucurbitacin B.mol	10.13422/j.cnki.syfjx.20181715				558.319
瓜蒌		3-表-异葫芦素B	3-epi-isocucurbitacin B	C32H46O8	558.712	89647-62-1	3-epi-isocucurbitacin B.mol	10.13422/j.cnki.syfjx.20181715				558.319
瓜蒌		异葫芦素B	isocucurbitacin B	C32H46O8	558.712	17278-28-3	isocucurbitacin B.mol	10.13422/j.cnki.syfjx.20181715				558.319
瓜蒌		二氢异葫芦素B	dihydroisocucurbitacin B	C32H48O8	560.728		dihydroisocucurbitacin B.mol	10.13422/j.cnki.syfjx.20181715				560.335
瓜蒌		23,24-二氢异葫芦素B	23,24-dihydrocucurbitacin B	C32H48O8	560.728	13201-14-4	23,24-dihydrocucurbitacin B.mol	10.13422/j.cnki.syfjx.20181715				560.335
瓜蒌		葫芦素D	cucurbitacin D	C30H44O7	516.675	3877-86-9	cucurbitacin D.mol	10.13422/j.cnki.syfjx.20181715				516.309
瓜蒌		异葫芦素D	isocucurbitacin D	C30H44O7	516.675	68422-20-8	isocucurbitacin D.mol	10.13422/j.cnki.syfjx.20181715				516.309
瓜蒌		23,24-二氢葫芦素D	23,24-dihydrocucurbitacin D	C30H46O7	518.691	55903-92-9	23,24-dihydrocucurbitacin D.mol	10.13422/j.cnki.syfjx.20181715				518.324
瓜蒌		23,24-二氢葫芦素E	23,24-dihydrocucurbitacin E	C32H46O8	558.712	28973-67-3	23,24-dihydrocucurbitacin E.mol	10.13422/j.cnki.syfjx.20181715				558.319
瓜蒌		维生素E	vitamin E	C29H50O2	430.717	059-2-9	vitamin E.mol	10.13422/j.cnki.syfjx.20181715				430.381
瓜蒌		(-)-黑麦草内酯	(-)-loliolide	C11H16O3	196.246	1493515	(-)-loliolide.mol	10.13422/j.cnki.syfjx.20181715				196.11
瓜蒌		6-羟基-4,7-巨豆二烯-3,9-二酮	6-hydroxy-4,7-megastigmadiene- 3,9-dione	C13H18O3	222.284	14398-38-0	6-hydroxy-4,7-megastigmadiene- 3,9-dione.mol	10.13422/j.cnki.syfjx.20181715				222.126
瓜蒌		正壬醇	N-Nonanol	C9H20O	144.258	143-08-8	N-Nonanol.mol	10.13422/j.cnki.syfjx.20181715				144.151
瓜蒌		豨莶精醇	darutigenol	C20H34O3	322.489	5940-00-1	darutigenol.mol	10.13422/j.cnki.syfjx.20181715				322.251
瓜蒌		菜油甾醇	campesterol	C28H48O	400.691	474-62-4	campesterol.mol	10.13422/j.cnki.syfjx.20181715				400.371
瓜蒌		β-谷甾醇	β-sitosterol	C29H50O	414.718	83-46-5	β-sitosterol.mol	10.13422/j.cnki.syfjx.20181715				414.386
瓜蒌		胡萝卜甾醇	daucosterol	C35H60O6	576.859	474-58-8	daucosterol.mol	10.13422/j.cnki.syfjx.20181715				576.439
瓜蒌		α-菠甾醇	α-spinasterol	C29H48O	412.702	481-18-5	α-spinasterol.mol	10.13422/j.cnki.syfjx.20181715				412.371
瓜蒌		豆甾醇	stigmasterol	C30H50	410.73	83-48-7	stigmasterol.mol	10.13422/j.cnki.syfjx.20181715				410.391
瓜蒌			3-O-β-D-glucopyranosyl-stigmasterol	C35H58O6	574.843	19716-26-8	3-O-β-D-glucopyranosyl-stigmasterol.mol	10.13422/j.cnki.syfjx.20181715				574.423
瓜蒌			stigmasta-7,22-dien-3β-ol	C29H48O	412.702	4651-46-1	stigmasta-7,22-dien-3β-ol.mol	10.13422/j.cnki.syfjx.20181715				412.371
瓜蒌			stigmastanol glucoside	C35H62O6	578.875		stigmastanol glucoside.mol	10.13422/j.cnki.syfjx.20181715				578.455
瓜蒌			stigmasta-7-en-3β-ol	C29H50O	414.718		stigmasta-7-en-3β-ol.mol	10.13422/j.cnki.syfjx.20181715				414.386
瓜蒌			7,22,25-Stigmastatrienol	C29H46O	410.686		7,22,25-Stigmastatrienol.mol	10.13422/j.cnki.syfjx.20181715				410.355
瓜蒌			stigmasta-7-en-3-one	C29H48O	412.702		stigmasta-7-en-3-one.mol	10.3321/j.issn:1001-5302.1999.10.019				412.371
瓜蒌		5α，8α-环氧麦角新碱-6,22e-二烯-3β-醇	5α,8α-epidioxyergosta-6,22E-dien-3β-ol	C28H44O3	428.657		5α,8α-epidioxyergosta-6,22E-_x0002_dien-3β-ol.mol	10.13422/j.cnki.syfjx.20181715				428.329
瓜蒌		5α，8α-环氧麦角甾-6,9（11），22E-三烯-3β-醇	5α,8α-epidioxyergosta-6,9(11),22E-trien-3β-ol	C28H42O3	426.641		5α,8α-epidioxyergosta-6,9(11),22E-trien-3β-ol.mol	10.13422/j.cnki.syfjx.20181715				426.313
瓜蒌		芹菜素	apigenin	C15H10O5	270.24	520-36-5	apigenin.mol	10.13422/j.cnki.syfjx.20181715				270.053
瓜蒌		芹菜素-7-O-β-D-葡萄糖苷	apigenin-7-O-β-D–glucopyranoside	C21H20O10	432.381	578-74-5	apigenin-7-O-β-D–glucopyranoside.mol	10.13422/j.cnki.syfjx.20181715				432.106
瓜蒌		5,6,7,8,4'-五甲氧基黄酮	5,6,7,8,4'-pentamethoxyflavon	C20H20O7	372.373		5,6,7,8,4'-pentamethoxyflavon.mol	10.13422/j.cnki.syfjx.20181715				372.121
瓜蒌		香叶木素	diosmetin	C16H12O6	300.266	520-34-3	diosmetin.mol	10.13422/j.cnki.syfjx.20181715				300.063
瓜蒌		香叶木素-7-O-β-D-	diosmetin-7-O-β-D-glucopyranoside	C22H22O11	462.407		diosmetin-7-O-β-D-glucopyranoside.mol	10.13422/j.cnki.syfjx.20181715				462.116
瓜蒌		木犀草素	luteolin	C15H10O6	286.239	491-70-3	luteolin.mol	10.13422/j.cnki.syfjx.20181715				286.048
瓜蒌		木犀草素-7-O-β-D-葡糖糖苷	luteolin-7-O-β-D-glucoside	C21H20O11	448.38	1268798	luteolin-7-O-β-D-glucoside.mol	10.13422/j.cnki.syfjx.20181715				448.101
瓜蒌		5,6,7,8,3'，4'-六甲氧基黄酮	5,6,7,8,3',4' -hexamethoxyflavone	C21H22O8	402.399		5,6,7,8,3',4' -hexamethoxyflavone.mol	10.13422/j.cnki.syfjx.20181715				402.131
瓜蒌		甲氧基木犀草素	chrysoeriol	C16H12O6	300.266	491-71-4	chrysoeriol.mol	10.13422/j.cnki.syfjx.20181715				300.063
瓜蒌		大黄酚-7-O-β-D-葡萄糖苷	chrysoeriol-7-O-β-D-glucopyranoside	C22H22O11	462.407		chrysoeriol-7-O-β-D-glucopyranoside.mol	10.13422/j.cnki.syfjx.20181715				462.116
瓜蒌		麦黄酮	tricin	C17H14O7	330.292	520-32-1	tricin.mol	10.13422/j.cnki.syfjx.20181715				330.074
瓜蒌		白藜芦醇苷--5'-甲醚	isoetin 5'-methyl ether	C16H12O7	316.265		isoetin 5'-methyl ether.mol	10.13422/j.cnki.syfjx.20181715				316.058
瓜蒌		槲皮素-3-O-β-D-葡萄糖苷	quercetin-3-O-β-D-glucopyranoside	C21H20O12	464.379		quercetin-3-O-β-D-glucopyranoside.mol	10.13422/j.cnki.syfjx.20181715				464.095
瓜蒌		槲皮素-3-O-芸香苷	quercetin-3-O-rutinoside	C27H30O16	610.521	153-18-4	quercetin-3-O-rutinoside.mol	10.13422/j.cnki.syfjx.20181715				610.153
瓜蒌		槲皮素-3-O-[α-l-鼠李糖（1→2）-β-D-吡喃葡萄糖基]-5-O-β-D-吡喃糖	quercetin-3-O-[α-L-rhamnose(1→2)-β-D-glucopyranosyl]-5-O-β-D-glucopyranoside	C33H40O21	772.662		quercetin-3-O-[α-L-rhamnose(1→2)-β-D-glucopyranosyl]-5-O-β-D-glucopyranoside.mol	10.13422/j.cnki.syfjx.20181715				772.26
瓜蒌		4'，6-二羟基-4-甲氧异橙酮	4',6-dihydroxy-4-methoxyisoaurone	C16H12O5	284.267		4',6-dihydroxy-4-methoxyisoaurone.mol	10.13422/j.cnki.syfjx.20181715				284.068
瓜蒌		栝楼酯碱	trichosanatine	C27H28N2O4	444.531	169626-16-8	trichosanatine.mol	10.3321/j.issn:1001-5302.1999.10.019				444.205
瓜蒌			soyacerebroside Ⅰ	C40H75NO9	714.038	115074-93-6	soyacerebroside Ⅰ.mol	10.13422/j.cnki.syfjx.20181715				713.544
瓜蒌			aralia cerebroside	C40H77NO10	731.053		aralia cerebroside.mol	10.13422/j.cnki.syfjx.20181715				731.555
瓜蒌		腺苷	adenosine	C10H13N5O4	267.245	58-61-7	adenosine.mol	10.13422/j.cnki.syfjx.20181715				267.097
瓜蒌		尿囊素	allantoin	C4H6N4O3	158.117	97-59-6	allantoin.mol	10.13422/j.cnki.syfjx.20181715				158.044
瓜蒌		尿苷	uridine	C9H12N2O6	244.203	58-96-8	uridine.mol	10.13422/j.cnki.syfjx.20181715				244.07
瓜蒌		鸟苷	guanosine	C10H13N5O5	283.244	118-00-3	guanosine.mol	10.13422/j.cnki.syfjx.20181715				283.092
瓜蒌		6-异肌苷	6-isoinosine	C10H12N4O5	268.229		6-isoinosine.mol	10.13422/j.cnki.syfjx.20181715				268.081
瓜蒌		胞嘧啶	cytosine	C4H5N3O	110.104	71-30-7	cytosine.mol	10.13422/j.cnki.syfjx.20181715				110.043
瓜蒌		尿嘧啶	uracil	C4H4N2O2	112.027	66-22-8	uracil.mol	10.13422/j.cnki.syfjx.20181715				112.088
瓜蒌		胸腺嘧啶	thymine	C5H6N2O2	126.115	65-71-4	thymine.mol	10.13422/j.cnki.syfjx.20181715				126.043
瓜蒌		次黄嘌呤	hypoxanthine	C5H4N4O	136.114	68-94-0	hypoxanthine.mol	10.13422/j.cnki.syfjx.20181715				136.039
瓜蒌		鸟嘌呤	guanine	C5H5N5O	151.129	73-40-5	guanine.mol	10.13422/j.cnki.syfjx.20181715				151.049
瓜蒌		黄嘌呤	xanthine	C5H2N4O2	152.113	69-89-6	xanthine.mol	10.13422/j.cnki.syfjx.20181715				152.033
瓜蒌		腺嘌呤	adenine	C5H5N5	135.13	73-24-5	adenine.mol	10.13422/j.cnki.syfjx.20181715				135.054
瓜蒌		烟酸	nicotinic acid	C6H5NO2	123.111	59-67-6	nicotinic acid.mol	10.13422/j.cnki.syfjx.20181715				123.032
瓜蒌		4-羟基烟酸	4-hydroxy-nicotinic acid	C6H5NO3	139.11	609-70-1	4-hydroxy-nicotinic acid.mol	10.13422/j.cnki.syfjx.20181715				139.027
瓜蒌		焦谷氨酸乙酯	pyroglutamic acid ethylester	C7H11NO3	157.169		pyroglutamic acid ethylester.mol	10.13422/j.cnki.syfjx.20181715				157.074
瓜蒌		5-乙氧基甲基-1-羧基丙基-1H-吡咯-2-乙醛	5-ethoxymethyl-1-carboxylpropyl-1H-pyrrole-2-carbaldehyde	C12H17NO4	239.271		5-ethoxymethyl-1-carboxylpropyl-1H-pyrrole-2-carbaldehyde.mol	10.13422/j.cnki.syfjx.20181715				239.116
瓜蒌		N-苯基邻苯二甲酰亚胺	N-phenyl phthalimide	C14H9NO2	223.231	520-03-6	N-phenyl phthalimide.mol	10.13422/j.cnki.syfjx.20181715				223.063
瓜蒌		4-（2-甲酰基-5-羟甲基吡咯-1-基）-丁酸	4-(2-formyl-5-hydroxymethylpyrrol-1-yl)-butyric acid	C10H13NO4	211.217		4-(2-formyl-5-hydroxymethylpyrrol-1-yl)-butyric acid.mol	10.13422/j.cnki.syfjx.20181715				211.084
瓜蒌		酒渣碱	flazine	C17H12N2O4	308.293	100041-05-2	flazine.mol	10.13422/j.cnki.syfjx.20181715				308.08
瓜蒌		1-脱氧-1-[2'-氧-1'-吡咯烷基]-2-正丁基-α-呋喃果苷	1-deoxy-1-[2'-oxo-1'-pyrrolidinyl]-2-n-butyl-α-fructofuranoside	C14H25NO6	303.355		1-deoxy-1-[2'-oxo-1'-pyrrolidinyl]-2-n-butyl-α-fructofuranoside.mol	10.13422/j.cnki.syfjx.20181715				303.168
瓜蒌		异落叶松脂素	isolariciresinol	C20H24O6	360.406	548-29-8	isolariciresinol.mol	10.13422/j.cnki.syfjx.20181715				360.157
瓜蒌		开环异落叶松树脂素	secoisolariciresinol	C20H26O6	362.422	29388-59-8	secoisolariciresinol.mol	10.13422/j.cnki.syfjx.20181715				362.173
瓜蒌		木霉素	trichobenzolignan	C18H18O4	298.121	1651866-59-9	trichobenzolignan.mol	10.13422/j.cnki.syfjx.20181715				298.121
瓜蒌		汉木素	hanultarin	C30H34O9	538.593		hanultarin.mol	10.13422/j.cnki.syfjx.20181715				538.22
瓜蒌		柳胺醇	ligballinol	C18H18O4	298.338		ligballinol.mol	10.13422/j.cnki.syfjx.20181715				298.121
瓜蒌		(-)-松脂醇	(-)-pinoresinol	C20H22O6	358.39	4263-88-1	(-)-pinoresinol.mol	10.13422/j.cnki.syfjx.20181715				358.142
瓜蒌		4-酮松脂醇	4-ketopinoresinol	C20H20O7	372.373		4-ketopinoresinol.mol	10.13422/j.cnki.syfjx.20181715				372.121
瓜蒌		补骨脂素	psoralen	C11H6O3	186.166	66-97-7	psoralen.mol	10.13422/j.cnki.syfjx.20181715				186.032
瓜蒌		糠酸	furoic acid	C3H7NO5S	112.084	88-14-2	furoic acid.mol	10.13422/j.cnki.syfjx.20181715				112.016
瓜蒌		蓝葵烯醇A	bluemenol A	C13H20O3	224.3	23526-45-6	bluemenol A.mol	10.13422/j.cnki.syfjx.20181715				224.141
瓜蒌			ehletianol C	C30H36O10	556.608		ehletianol C.mol	10.13422/j.cnki.syfjx.20181715				556.231
瓜蒌			cucumegastigmanes	C13H20O4	240.299		cucumegastigmanes.mol	10.13422/j.cnki.syfjx.20181715				240.136
瓜蒌		2-甲氧基-2-（4’-羟基苯基）-乙醇	2-methoxy-2-(4'-hydroxyphenyl)-ethanol	C9H12O3	168.192		2-methoxy-2-(4'-hydroxyphenyl)-ethanol.mol	10.13422/j.cnki.syfjx.20181715				168.079
瓜蒌		4’-二氢油酸	4'-dihydrophaseic acid	C15H22O5	282.336		4'-dihydrophaseic acid.mol	10.13422/j.cnki.syfjx.20181715				282.147
瓜蒌		（-）-二氢甲酸甲酯	(-)-methyl dihydrophaseate	C16H24O5	296.363		(-)-methyl dihydrophaseate.mol	10.13422/j.cnki.syfjx.20181715				296.162
瓜蒌		8，9-二氢-8，9-二羟基巨豆三烯酮	8,9-dihydro-8,9-dihydroxymegastigmatrienone	C13H20O3	224.3		8,9-dihydro-8,9-dihydroxymegastigmatrienone.mol	10.13422/j.cnki.syfjx.20181715				224.141
瓜蒌		1，3-O-[5-（羟基甲基）-呋喃-2-基]甲基-2-正丁基-α果糖	1,3-O-[5-(hydroxymethyl)-furan-2-yl]methenyl-2-n-butyl-α-fructofuranoside	C16H24O8	144.36		1,3-O-[5-(hydroxymethyl)-furan-2-yl]methenyl-2-n-butyl-α-fructofuranoside.mol	10.13422/j.cnki.syfjx.20181715				344.147
瓜蒌		n-丁基-3，4-二羟基-5-羟基甲基-4-O-[5-（羟基甲基）-呋喃-2-基]-四氢呋喃-2-羧酸	n-butyl-3,4-dihydroxyl-5-hydroxymethyl-4-O-[5-(hydroxymethyl)-furan-2-yl]-tetrahydrofuran-2-carboxylate	C16H24O9	360.359		n-butyl-3,4-dihydroxyl-5-hydroxymethyl-4-O-[5-(hydroxymethyl)-furan-2-yl]-tetrahydrofuran-2-carboxylate.mol	10.13422/j.cnki.syfjx.20181715				360.142
瓜蒌		呋喃-2，5-二甲醇	furan-2,5-diyldimethanol	C6H12O3	128.127	1883-75-6	furan-2,5-diyldimethanol.mol	10.13422/j.cnki.syfjx.20181715				128.047
瓜蒌		5-羟甲基-2-糠醛	5-hydroxymethyl-2-furfural	C5H6O3	126.111	67-47-0	5-hydroxymethyl-2-furfural.mol	10.13422/j.cnki.syfjx.20181715				126.032
瓜蒌		对羟基苯甲醛	p-hydroxybenzaldehyde	C7H6O2	122.123	123-08-0	p-hydroxybenzaldehyde.mol	10.13422/j.cnki.syfjx.20181715				122.037
瓜蒌		邻羟基苯甲酸	o-hydroxybenzoic acid	C7H6O3	138.122	69-72-7	o-hydroxybenzoic acid.mol	10.13422/j.cnki.syfjx.20181715				138.032
瓜蒌		对羟基苯甲酸	p-hydroxybenzoic acid	C7H6O3	138.122	99-96-7	p-hydroxybenzoic acid.mol	10.13422/j.cnki.syfjx.20181715				138.032
瓜蒌		丹皮酚	paeonol	C9H10O3	166.176	552-41-0	paeonol.mol	10.13422/j.cnki.syfjx.20181715				166.063
瓜蒌			7,24-Stigmastadienol	C29H48O	412.702	50632-69-4	7,24-Stigmastadienol.mol	10.13422/j.cnki.syfjx.20181715				412.371
瓜蒌			7,25-Stigmastadienol	C29H48O	412.702	6785-58-6	7,25-Stigmastadienol.mol	10.13422/j.cnki.syfjx.20181715				412.371
瓜蒌			Campesterol ferulate	C38H56O4	576.862	20972-07-0	Campesterol ferulate.mol	10.13422/j.cnki.syfjx.20181715				576.418
瓜蒌		7-羟基色酮	7-hydroxychromone	C9H6O3	162.144	59887-89-7	7-hydroxychromone.mol	10.13422/j.cnki.syfjx.20181715				162.032
瓜蒌		3-羟基-1-（4-羟基苯基）-1-丙酮	3-hydroxy-1-(4-hydroxyphenyl)-1-propanone	C9H10O3	166.176	53170-93-7	3-hydroxy-1-(4-hydroxyphenyl)-1-propanone.mol	10.13422/j.cnki.syfjx.20181715				166.063
瓜蒌		2-[4-（3-羟丙基）-2-甲氧基苯氧基]-丙烷-1,3-二醇	2-[4-(3-hydroxypropyl)-2-methoxyphenoxy]-propane-1,3-diol	C13H20O5	256.298		2-[4-(3-hydroxypropyl)-2-methoxyphenoxy]-propane-1,3-diol.mol	10.13422/j.cnki.syfjx.20181715				256.131
瓜蒌		2-[4-（3-羟基-1-丙烯基）-2-甲氧基苯氧基]-1,3-丙二醇	2-[4-(3-hydroxy-1-propenyl)-2-methoxyphenoxy]-1,3-propanediol	C13H18O5	254.282		2-[4-(3-hydroxy-1-propenyl)-2-methoxyphenoxy]-1,3-propanediol.mol	10.13422/j.cnki.syfjx.20181715				254.115
瓜蒌		肉豆蔻醚	Myristicin	C11H12O3	192.214	607-91-0	Myristicin.mol	10.13422/j.cnki.syfjx.20181715				192.079
瓜蒌		十四烷	Tetradecane	C14H30	198.394	629-59-4	Tetradecane.mol	10.13422/j.cnki.syfjx.20181715				198.235
瓜蒌		月桂醛	Lauric Aldehyde	C12H24O	184.323	112-54-9	Lauric Aldehyde.mol	10.13422/j.cnki.syfjx.20181715				184.183
瓜蒌		殷金醇棕榈酸酯	20-Hexadecanoylingenol	C24H34O6	586.842		20-Hexadecanoylingenol.mol	10.13422/j.cnki.syfjx.20181715				586.423
瓜蒌		5，25-豆甾二烯醇-3-β-D-葡萄糖甙	5,25-Stigmastadien-3-β-Ol-D-β-Glucoside	C35H58O6	574.831		5,25-Stigmastadien-3-β-Ol-D-β-Glucoside.mol	10.13422/j.cnki.syfjx.20181715				574.423
瓜蒌		5α-豆甾-7-烯-3β-醇	5α-Stigmast-7-En-3-β-Ol	C29H50O	414.718		5α-Stigmast-7-En-3-β-Ol.mol	10.13422/j.cnki.syfjx.20181715				414.386
瓜蒌		十五烯	Pentadecene	C15H30	210.405	13360-61-7	Pentadecene.mol	10.13422/j.cnki.syfjx.20181715				210.235
瓜蒌		γ-氨基丁酸	γ-Aminobutyric Acid	C4H9NO2	103.121	20791	γ-Aminobutyric Acid.mol	10.13422/j.cnki.syfjx.20181715				103.063
瓜蒌		α-菠菜甾醇-β-D-葡萄糖苷	α-Spinasterol-β-D-Glucoside	C35H58O6	574.831		α-Spinasterol-β-D-Glucoside.mol	10.13422/j.cnki.syfjx.20181715				574.423
瓜蒌		瓜蒌酸	Trichosanicacid	C18H30O2	278.436	544-72-9	Trichosanicacid.mol	10.13422/j.cnki.syfjx.20181715				278.225
瓜蒌			2-NONENAL	C9H16O	140.226	18829-56-6	2-NONENAL.mol	10.13422/j.cnki.syfjx.20181715				140.12

## Sheet: DNX
Name	01 number	05 Chinese name	06 English name	07 Formula	08 Molecular weight	09 CAS number	10 2D structure	22 Literature resources	11 Physicochemical property	12 Pharmacology	13 Retention time	15 Exact molecular weight	16 Error	17 Fragments	18 Existence form	23 ALogP	24 LogD	25 Molecular_Solubility	26 Molecular_Volume	27 Molecular_SurfaceArea	28 Molecular_PolarSurfaceArea	29 Num_RotatableBonds	30 Num_H_Acceptors	31 Num_H_Donors	32 ADMET_Absorption_Level	33 ADMET_BBB_Level	34 ADMET_BBB	35 ADMET_Solubility_Level	36 ADMET_Solubility	37 ADMET_Hepatotoxicity	38 ADMET_Hepatotoxicity_Probability	39 ADMET_CYP2D6	40 ADMET_CYP2D6_Probability	41 ADMET_PPB_Level
天南星		芹菜素-6-C-β-D-吡喃葡萄糖-8-C-α-L-阿拉伯糖苷	Apigenin-6-C-beta-D-glucopyranose-8-C-alpha-L-arabinoside	C26H28O14	564.496		Apigenin-6-C-beta-D-glucopyranose-8-C-alpha-L-arabinoside.mol	10.3321/j.issn:1001-2494.2005.19.005				564.148
天南星		芹菜素-6-C-α-L-阿拉伯糖-8-C-β-D-吡喃葡萄糖苷	Apigenin-6-C-alpha-L-arabinose-8-C-beta-D-glucopyranoside	C26H28O14	564.496		Apigenin-6-C-alpha-L-arabinose-8-C-beta-D-glucopyranoside.mol	10.3321/j.issn:1001-2494.2005.19.005				564.148
天南星		芹菜素-6,8-二-C-葡萄糖苷	Apigenin-6,8-di-C-glucoside	C27H30O15	594.522	23666-13-9	Apigenin-6,8-di-C-glucoside.mol	10.3321/j.issn:1001-2494.2005.19.005				594.158
天南星		柠檬酸	citric acid	C6H8O7	192.123	77-92-9	citric acid.mol	10.11954/ytctyy.201604017				192.027
天南星		苹果酸	malic acid	C4H6O5	134.087	6915-15-7	malic acid.mol	10.11954/ytctyy.201604017				134.022
天南星		癸二酸	Sebacic acid	C10H18O4	202.25	111-20-6	Sebacic acid.mol	10.11954/ytctyy.201604017				202.121
天南星		油酸	oleic acid	C18H34O2	282.468	112-80-1	oleic acid.mol	10.11954/ytctyy.201604017				282.256
天南星		磷酸丝氨酸	Phosphoserine	C3H8NO6P	185.072	407-41-0	Phosphoserine.mol	http://kns.cnki.net/kcms/detail/detail.aspx?FileName=SHYK198903011&DbName=CJFQ1989				185.009
天南星		牛磺酸	taurine	C2H7NO3S	125.142	107-35-7	taurine.mol	http://kns.cnki.net/kcms/detail/detail.aspx?FileName=SHYK198903011&DbName=CJFQ1989				125.015
天南星		磷酸乙醇胺	phosphoethanolamine	C2H8NO4P	141.063	1071-23-4	phosphoethanolamine.mol	http://kns.cnki.net/kcms/detail/detail.aspx?FileName=SHYK198903011&DbName=CJFQ1989				141.019
天南星		天门冬氨酸	Aspartic acid	C4H7NO4	133.103	56-84-8	Aspartic acid.mol	http://kns.cnki.net/kcms/detail/detail.aspx?FileName=SHYK198903011&DbName=CJFQ1989				133.038
天南星		苏氨酸	threonine	C4H9NO3	119.12	72-19-5	threonine.mol	http://kns.cnki.net/kcms/detail/detail.aspx?FileName=SHYK198903011&DbName=CJFQ1989				119.058
天南星		丝氨酸	serine	C3H7NO3	105.093	56-45-1	serine.mol	http://kns.cnki.net/kcms/detail/detail.aspx?FileName=SHYK198903011&DbName=CJFQ1989				105.043
天南星		谷氨酸	glutamate	C5H9NO4	147.13	56-86-0	glutamate.mol	http://kns.cnki.net/kcms/detail/detail.aspx?FileName=SHYK198903011&DbName=CJFQ1989				147.053
天南星		谷氨酰胺	glutamine	C5H10N2O3	146.146	56-85-9	glutamine.mol	http://kns.cnki.net/kcms/detail/detail.aspx?FileName=SHYK198903011&DbName=CJFQ1989				146.069
天南星		肌氨酸	Sarcosine	C3H7NO2	89.094	107-97-1	Sarcosine.mol	http://kns.cnki.net/kcms/detail/detail.aspx?FileName=SHYK198903011&DbName=CJFQ1989				89.0477
天南星		α-氨基己二酸	Alpha-aminohexanedioic acid	C6H11NO4	161.157	1118-90-7	Alpha-aminohexanedioic acid.mol	http://kns.cnki.net/kcms/detail/detail.aspx?FileName=SHYK198903011&DbName=CJFQ1989				161.069
天南星		甘氨酸	glycine	C2H5NO2	75.067	56-40-6	glycine.mol	http://kns.cnki.net/kcms/detail/detail.aspx?FileName=SHYK198903011&DbName=CJFQ1989				75.032
天南星		瓜氨酸	Citrulline	C6H13N3O3	175.188	372-75-8	Citrulline.mol	http://kns.cnki.net/kcms/detail/detail.aspx?FileName=SHYK198903011&DbName=CJFQ1989				175.096
天南星		丙氨酸	alanine	C3H7NO2	89.094	56-41-7	alanine.mol	http://kns.cnki.net/kcms/detail/detail.aspx?FileName=SHYK198903011&DbName=CJFQ1989				89.0477
天南星		α-氨基正丁酸	Alpha-aminobutyric acid	C4H9NO2	103.121	2835-81-6	Alpha-aminobutyric acid.mol	http://kns.cnki.net/kcms/detail/detail.aspx?FileName=SHYK198903011&DbName=CJFQ1989				103.063
天南星		缬氨酸	valine	C5H11NO2	117.148	72-18-4	valine.mol	http://kns.cnki.net/kcms/detail/detail.aspx?FileName=SHYK198903011&DbName=CJFQ1989				117.079
天南星		胱氨酸	Cystine	C6H12N2O4S2	240.292	923-32-0	Cystine.mol	http://kns.cnki.net/kcms/detail/detail.aspx?FileName=SHYK198903011&DbName=CJFQ1989				240.024
天南星		甲硫氨酸	methionine	C5H11NO2S	149.208	59-51-8	methionine.mol	http://kns.cnki.net/kcms/detail/detail.aspx?FileName=SHYK198903011&DbName=CJFQ1989				149.051
天南星		胱硫酸	Cysteine sulfuric acid	C3H9NO6S2	219.226		Cysteine sulfuric acid.mol	http://kns.cnki.net/kcms/detail/detail.aspx?FileName=SHYK198903011&DbName=CJFQ1989				218.987
天南星		异亮氨酸	isoleucine	C6H13NO2	131.175	73-32-5	isoleucine.mol	http://kns.cnki.net/kcms/detail/detail.aspx?FileName=SHYK198903011&DbName=CJFQ1989				131.095
天南星		亮氨酸	leucine	C6H13NO2	131.175	61-90-5	leucine.mol	http://kns.cnki.net/kcms/detail/detail.aspx?FileName=SHYK198903011&DbName=CJFQ1989				131.095
天南星		酪氨酸	Tyrosine	C9H11NO3	181.191	60-18-4	Tyrosine.mol	http://kns.cnki.net/kcms/detail/detail.aspx?FileName=SHYK198903011&DbName=CJFQ1989				181.074
天南星		苯丙氨酸	Phenylalanine	C9H11NO2	165.192	63-91-2	Phenylalanine.mol	http://kns.cnki.net/kcms/detail/detail.aspx?FileName=SHYK198903011&DbName=CJFQ1989				165.079
天南星		β-丙氨酸	β-alanine	C3H7NO2	89.094	6-57-90-5	β-alanine.mol	http://kns.cnki.net/kcms/detail/detail.aspx?FileName=SHYK198903011&DbName=CJFQ1989				89.0477
天南星		β-氨基异丁酸	β-aminoisobutyric acid	C4H9NO2	103.121		β-aminoisobutyric acid.mol	http://kns.cnki.net/kcms/detail/detail.aspx?FileName=SHYK198903011&DbName=CJFQ1989				103.063
天南星		γ-氨基丁酸	Gamma-aminobutyric acid	C4H9NO2	103.121	056-12-2	Gamma-aminobutyric acid.mol	http://kns.cnki.net/kcms/detail/detail.aspx?FileName=SHYK198903011&DbName=CJFQ1989				103.063
天南星		羟基赖氨酸	Hydroxylysine	C6H14N2O3	162.189		Hydroxylysine.mol	http://kns.cnki.net/kcms/detail/detail.aspx?FileName=SHYK198903011&DbName=CJFQ1989				162.1
天南星		鸟氨酸	Ornithine	C5H12N2O2	132.163	70-26-8	Ornithine.mol	http://kns.cnki.net/kcms/detail/detail.aspx?FileName=SHYK198903011&DbName=CJFQ1989				132.09
天南星		色氨酸	Tryptophan	C11H12N2O2	204.229	73-22-3	Tryptophan.mol	http://kns.cnki.net/kcms/detail/detail.aspx?FileName=SHYK198903011&DbName=CJFQ1989				204.09
天南星		赖氨酸	Lysine	C6H14N2O2	146.19	56-87-1	Lysine.mol	http://kns.cnki.net/kcms/detail/detail.aspx?FileName=SHYK198903011&DbName=CJFQ1989				146.106
天南星		1-甲基组氨酸	1-methylhistidine	C7H11N3O2	169.184	332-80-9	1-methylhistidine.mol	http://kns.cnki.net/kcms/detail/detail.aspx?FileName=SHYK198903011&DbName=CJFQ1989				169.085
天南星		组氨酸	histidine	C6H9N3O2	155.157	71-00-1	histidine.mol	http://kns.cnki.net/kcms/detail/detail.aspx?FileName=SHYK198903011&DbName=CJFQ1989				155.069
天南星		鹅肌肽	anserine	C10H16N4O3	240.263	584-85-0	anserine.mol	http://kns.cnki.net/kcms/detail/detail.aspx?FileName=SHYK198903011&DbName=CJFQ1989				240.122
天南星		肌肽	Carnosine	C9H14N4O3	226.236	305-84-0	Carnosine.mol	http://kns.cnki.net/kcms/detail/detail.aspx?FileName=SHYK198903011&DbName=CJFQ1989				226.107
天南星		精氨酸	Arginine	C6H14N4O2	174.204	74-79-3	Arginine.mol	http://kns.cnki.net/kcms/detail/detail.aspx?FileName=SHYK198903011&DbName=CJFQ1989				174.112
天南星		脯氨酸	proline	C5H9NO2	115.132	147-85-3	proline.mol	http://kns.cnki.net/kcms/detail/detail.aspx?FileName=SHYK198903011&DbName=CJFQ1989				115.063
天南星		天门冬酰胺	Asparagine	C4H8N2O3	132.119	70-47-3	Asparagine.mol	http://kns.cnki.net/kcms/detail/detail.aspx?FileName=SHYK198903011&DbName=CJFQ1989				132.053
天南星		羟脯氨酸	hydroxyproline	C5H9NO3	131.131	51-35-4	hydroxyproline.mol	http://kns.cnki.net/kcms/detail/detail.aspx?FileName=SHYK198903011&DbName=CJFQ1989				131.058
天南星		己基酸	caprlylic acid	C8H12O2	144.214		caprlylic acid.mol	10.13481/j.1671-587x.2001.02.018				144.115
天南星		透明质酸	pelargonic acid	C9H18O2	158.241	112-05-0	pelargonic acid.mol	10.13481/j.1671-587x.2001.02.018				158.131
天南星		己酸	hexanoic acid, 2-isoproyl-2-methy1-5-oxo-	C6H12O2	116.16	142-62-1	hexanoic acid, 2-isoproyl-2-methy1-5-oxo-.mol	10.13481/j.1671-587x.2001.02.018				116.084
天南星		十五烷酸	pentadecanoic acid	C15H30O2	242.403	1002-84-2	pentadecanoic acid.mol	10.13481/j.1671-587x.2001.02.018				242.225
天南星		十七烷酸	heptadecanoic acid	C17H34O2	270.457	506-12-7	heptadecanoic acid.mol	10.13481/j.1671-587x.2001.02.018				270.256
天南星		十七烷酸-16甲基	heptadecanoic acid,-16-methyl	C18H36O2	284.484	2724-58-5	heptadecanoic acid,-16-methyl.mol	10.13481/j.1671-587x.2001.02.018				284.272
天南星		棕榈酸	palmitic acid	C16H32O2	256.43	057-10-3	palmitic acid.mol	10.13481/j.1671-587x.2001.02.018				256.24
天南星		亚油酸	linoleic acid	C18H32O2	280.452	60-33-3	linoleic acid.mol	10.13481/j.1671-587x.2001.02.018				280.24
天南星		硬脂酸	stearic acid	C18H36O2	284.484	057-11-4	stearic acid.mol	10.13481/j.1671-587x.2001.02.018				284.272
天南星		异油酸	isooleic acid	C18H34O2	282.468		isooleic acid.mol	10.13481/j.1671-587x.2001.02.018				282.256
天南星		亚麻酸	linolenic acid	C18H30O2	278.436	463-40-1	linolenic acid.mol	10.13481/j.1671-587x.2001.02.018				278.225
天南星		花生酸	arachidic acid	C20H40O2	312.538	506-30-9	arachidic acid.mol	10.13481/j.1671-587x.2001.02.018				312.303
天南星		脱色酸	decosanoic acid	C22H44O2	340.592		decosanoic acid.mol	10.13481/j.1671-587x.2001.02.018				340.334
天南星		四氯乙酸	tetralosanoic acid	C24H48O2	368.646		tetralosanoic acid.mol	10.13481/j.1671-587x.2001.02.018				368.365
天南星		十六酸-3-羟基	hexadecanoic acid,-3-hydroxy	C16H32O3	272.429	928-17-6	hexadecanoic acid,-3-hydroxy.mol	10.13481/j.1671-587x.2001.02.018				272.235
天南星		壬二酸	azelaic acid	C9H16O4	188.223	123-99-9	azelaic acid.mol	10.13481/j.1671-587x.2001.02.018				188.105
天南星		β-谷甾醇	β-sitosterol	C29H50O	414.718	83-46-5	β-sitosterol.mol	10.13481/j.1671-587x.2001.02.018				414.386
天南星		甘露醇	mannitol	C6H14O6	182.172	69-65-8	mannitol.mol	10.13481/j.1671-587x.2001.02.018				182.079
天南星		胡萝卜苷	daucosterol	C35H60O6	576.859	474-58-8	daucosterol.mol	10.13481/j.1671-587x.2001.02.018				576.439
天南星		葫芦巴碱	trigonelline	C7H7NO2	137.138	535-83-1	trigonelline.mol	http://kns.cnki.net/kcms/detail/detail.aspx?FileName=SHYK197904005&DbName=CJFQ1979				137.048
天南星		氯化胆碱	choline chloride	C5H14ClNO	139.623	67-48-1	choline chloride.mol	CNKI:SUN:ZGZY.0.1989-08-018				139.076
天南星		秋水仙碱	Colchicine	C22H25NO6	399.443	64-86-8	Colchicine.mol	10.13481/j.1671-587x.2001.02.018				399.168
天南星		胆碱	choline	C5H14NO+	104.172	62-49-7	choline.mol	10.1186/1471-2202-14-S1-P104				104.107
天南星		水仙碱	Narcissine	C16H17NO4	287.315	476-28-8	Narcissine.mol	10.1186/1471-2202-14-S1-P104				287.116
天南星		尿嘧啶	uracil	C4H4N2O2	112.088	66-22-8	uracil.mol	CNKI:SUN:ZSFX.0.2013-16-022				112.027
天南星		黄嘌呤	xanthine	C5H4N4O2	152.113	69-89-6	xanthine.mol	CNKI:SUN:ZSFX.0.2013-16-022				152.033
天南星		次黄嘌呤	Hypoxanthine	C5H4N4O	136.114	69-94-0	Hypoxanthine.mol	CNKI:SUN:ZSFX.0.2013-16-022				136.039
天南星		尿苷	Uridine	C9H12N2O6	244.203	58-96-8	Uridine.mol	CNKI:SUN:ZSFX.0.2013-16-022				244.07
天南星		肌苷	Inosine	C10H12N4O5	268.229	58-63-9	Inosine.mol	CNKI:SUN:ZSFX.0.2013-16-022				268.081
天南星		鸟苷	Guanosine	C10H13N5O5	283.244	118-00-3	Guanosine.mol	CNKI:SUN:ZSFX.0.2013-16-022				283.092
天南星		胸苷	Thymidine	C10H14N2O5	242.231	50-89-5	Thymidine.mol	CNKI:SUN:ZSFX.0.2013-16-022				242.09
天南星		腺苷	adenosine	C10H13N5O4	267.245	58-61-7	adenosine.mol	CNKI:SUN:ZSFX.0.2013-16-022				267.097
天南星		间位甲酚	m-cresol	C7H8O	108.14	108-39-4	m-cresol.mol	CNKI:SUN:SWJS.0.2007-05-020				108.058
天南星		2-烯丙基呋喃	2-Allylfuran	C7H8O	108.14	75135-41-0	2-Allylfuran.mol	CNKI:SUN:SWJS.0.2007-05-020				108.058
天南星		乙基苯	Ethylbenzene	C8H10	106.168	100-41-4	Ethylbenzene.mol	CNKI:SUN:SWJS.0.2007-05-020				106.078
天南星		间二甲苯	M-xylene	C8H10	106.168	108-38-3	M-xylene.mol	CNKI:SUN:SWJS.0.2007-05-020				106.078
天南星		苯乙烯	styrene	C8H8	104.152	100-42-5	styrene.mol	CNKI:SUN:SWJS.0.2007-05-020				104.063
天南星		对二甲苯	P-xylene	C8H10	106.168	106-42-3	P-xylene.mol	CNKI:SUN:SWJS.0.2007-05-020				106.078
天南星		正壬烷	n-Nonane	C9H20	128.259	111-84-2	n-Nonane.mol	CNKI:SUN:SWJS.0.2007-05-020				128.156
天南星		庚醛	Heptaldehyde	C7H14O	114.188	111-71-7	Heptaldehyde.mol	CNKI:SUN:SWJS.0.2007-05-020				114.104
天南星		2-甲基-5-丙基呋喃	2-methyl-5-propylfuran	C8H12O	124.183	1456-16-2	2-methyl-5-propylfuran.mol	CNKI:SUN:SWJS.0.2007-05-020				124.089
天南星		2-戊基呋喃	2-pentyl furan	C9H14O	138.21		2-pentyl furan.mol	CNKI:SUN:SWJS.0.2007-05-020				138.104
天南星		2-呋喃甲醇乙酸酯	2-Furanmethanol acetate	C7H8O3	140.138		2-Furanmethanol acetate.mol	CNKI:SUN:SWJS.0.2007-05-020				140.047
天南星		正辛醇	N-octanol	C8H18O	130.231	111-87-5	N-octanol.mol	CNKI:SUN:SWJS.0.2007-05-020				130.136
天南星		对异丙基甲苯	P-isopropyltoluene	C10H14	134.222	99-87-6	P-isopropyltoluene.mol	CNKI:SUN:SWJS.0.2007-05-020				134.11
天南星		苯丙烯	Phenylpropene	C9H10	118.179		Phenylpropene.mol	CNKI:SUN:SWJS.0.2007-05-020				118.078
天南星		柠檬烯	Limonene	C10H16	136.238	138-86-3	Limonene.mol	CNKI:SUN:SWJS.0.2007-05-020				136.125
天南星		1，8-桉树脑	1,8-Cineole	C10H18O	154.253		1,8-Cineole.mol	CNKI:SUN:SWJS.0.2007-05-020				154.136
天南星		茚	Indene	C9H8	116.163	95-13-6	Indene.mol	CNKI:SUN:SWJS.0.2007-05-020				116.063
天南星		1-异戊基吡咯	1-isoamylpyrrole	C9H15N	137.12		1-isoamylpyrrole.mol	CNKI:SUN:SWJS.0.2007-05-020				137.226
天南星		2,2'-次甲基呋喃	2,2'-Difurylmethane	C9H8O2	148.161		2,2'-Difurylmethane.mol	CNKI:SUN:SWJS.0.2007-05-020				148.052
天南星		十一烷	undecane	C11H24	156.313	1120-21-4	undecane.mol	CNKI:SUN:SWJS.0.2007-05-020				156.188
天南星		芫妥醇	(-)-Linalool	C10H18O	154.253	126-91-0	(-)-Linalool.mol	CNKI:SUN:SWJS.0.2007-05-020				154.136
天南星		二甲基苯并呋喃	Dimethylbenzofuran	C10H10O	146.189	82875-54-5	Dimethylbenzofuran.mol	CNKI:SUN:SWJS.0.2007-05-020				146.073
天南星		2-丁烯基苯	1-Phenyl-2-butene	C10H12	132.206		1-Phenyl-2-butene.mol	CNKI:SUN:SWJS.0.2007-05-020				132.094
天南星		1-氢-1-甲基茚	1-Methyl-1H-indene	C10H10	130.19	767-59-9	1-Methyl-1H-indene.mol	CNKI:SUN:SWJS.0.2007-05-020				130.078
天南星		戊基苯	Pentylbenzene	C11H16	148.249	538-68-1	Pentylbenzene.mol	CNKI:SUN:SWJS.0.2007-05-020				148.125
天南星		2-糠基-5-甲基呋喃	2-Furfuryl-5-methylfuran	C10H10O2	162.188	1378-51-86	2-Furfuryl-5-methylfuran.mol	CNKI:SUN:SWJS.0.2007-05-020				162.068
天南星		α-萜品醇	α-terpineol	C10H18O	154.253	98-55-5	α-terpineol.mol	CNKI:SUN:SWJS.0.2007-05-020				154.136
天南星		十二烷	dodecane	C12H26	170.34	112-40-3	dodecane.mol	CNKI:SUN:SWJS.0.2007-05-020				170.203
天南星		2-十二烯	2-dodecene	C12H24	168.324	1652-96-6	2-dodecene.mol	CNKI:SUN:SWJS.0.2007-05-020				168.188
天南星		十三烷	tridecane	C13H28	184.367	629-50-5	tridecane.mol	CNKI:SUN:SWJS.0.2007-05-020				184.219
天南星		十四烷	tetradecane	C14H30	198.394	629-59-4	tetradecane.mol	CNKI:SUN:SWJS.0.2007-05-020				198.235
天南星		β-石竹烯	β-Caryophyllene	C15H24	204.357		β-Caryophyllene.mol	CNKI:SUN:SWJS.0.2007-05-020				204.188
天南星		十五烷	Pentadecane	C15H32	212.421	629-62-9	Pentadecane.mol	CNKI:SUN:SWJS.0.2007-05-020				212.25
天南星		β-红没药烯	β-bisabolene	C15H24	204.357		β-bisabolene.mol	CNKI:SUN:SWJS.0.2007-05-020				204.188
天南星		γ-杜松萜烯	gamma-Cadinene	C15H24	204.357	483-74-9	gamma-Cadinene.mol	CNKI:SUN:SWJS.0.2007-05-020				204.188
天南星		δ-杜松萜烯	δ-cadinene	C15H24	204.357	523-47-7	δ-cadinene.mol	CNKI:SUN:SWJS.0.2007-05-020				204.188
天南星		石竹烯氧化物	Caryophyllene oxide	C15H24O	220.356	1139-30-6	Caryophyllene oxide.mol	CNKI:SUN:SWJS.0.2007-05-020				220.183
天南星		十六烷	hexadecane	C16H34	226.448	544-76-3	hexadecane.mol	CNKI:SUN:SWJS.0.2007-05-020				226.266
天南星		细辛醚	Asarone	C12H16O3	208.257	2883-98-9	Asarone.mol	CNKI:SUN:SWJS.0.2007-05-020				208.11
天南星		十八醛	octadecanal	C18H36O	268.485	638-66-4	octadecanal.mol	CNKI:SUN:SWJS.0.2007-05-020				268.277

## Sheet: DH
Name	01 number	05 Chinese name	06 English name	07 Formula	08 Molecular weight	09 CAS number	10 2D structure	22 Literature resources	11 Physicochemical property	12 Pharmacology	13 Retention time	15 Exact molecular weight	16 Error	17 Fragments	18 Existence form	23 ALogP	24 LogD	25 Molecular_Solubility	26 Molecular_Volume	27 Molecular_SurfaceArea	28 Molecular_PolarSurfaceArea	29 Num_RotatableBonds	30 Num_H_Acceptors	31 Num_H_Donors	32 ADMET_Absorption_Level	33 ADMET_BBB_Level	34 ADMET_BBB	35 ADMET_Solubility_Level	36 ADMET_Solubility	37 ADMET_Hepatotoxicity	38 ADMET_Hepatotoxicity_Probability	39 ADMET_CYP2D6	40 ADMET_CYP2D6_Probability	41 ADMET_PPB_Level
大黄		大黄素	emodin	C15H10O5	270.24	518-82-1	emodin.mol	10.7666/d.d044120				270.053
大黄		芦荟大黄素	aloeemodin	C15H10O5	270.24	481-72-1	aloeemodin.mol	10.7666/d.d044120				270.053
大黄		大黄素甲醚	physcion	C16H12O5	284.267	521-61-9	physcion.mol	10.7666/d.d044120				284.068
大黄		大黄酸	rhein	C15H8O6	284.223	478-43-3	rhein.mol	10.7666/d.d044120				284.032
大黄		大黄酚	chrysophanol	C15H10O4	254.241	481-74-3	chrysophanol.mol	10.7666/d.d044120				254.058
大黄		土大黄素	Chrysaron	C22H26O3	338.44		Chrysaron.mol	10.7666/d.d044120				338.188
大黄		土大黄苷	citreorosein	C15H10O6	286.239	481-73-2	citreorosein.mol	10.7666/d.d044120				286.048
大黄		异大黄素	isoemodin	C15H10O5	270.24		isoemodin.mol	10.7666/d.d044120				270.053
大黄		虫漆酸D	laccaic acid D	C16H10O6	314.249	18499-84-8	laccaic acid D.mol	10.7666/d.d044120				314.249
大黄		大黄酸苷A	Rheinoside A	C27H30O16	610.521	111545-28-9	Rheinoside A.mol	10.7666/d.d044120				610.153
大黄		大黄酸苷B	Rheinoside B	C27H30O16	610.521		Rheinoside B.mol	10.7666/d.d044120				610.153
大黄		大黄酸苷C	Rheinoside C	C27H30O15	594.522	111545-29-0	Rheinoside C.mol	10.7666/d.d044120				594.158
大黄		大黄酸苷D	Rheinoside D	C27H30O15	594.522		Rheinoside D.mol	10.7666/d.d044120				594.158
大黄		大黄酸葡萄糖苷	Rhein Glucoside	C21H18O11	446.364	34298-86-7	Rhein Glucoside.mol	10.7666/d.d044120				446.085
大黄		大黄素甲醚葡萄糖苷	Physcion monoglucoside	C22H22O10	446.408	26296-54-8	Physcion monoglucoside.mol	10.7666/d.d044120				446.121
大黄		芦荟大黄素葡萄糖苷	Aloe emodin glucoside	C21H20O10	432.381	29010-56-8	Aloe emodin glucoside.mol	10.7666/d.d044120				432.106
大黄		大黄素葡萄糖苷	Emodin glucoside	C21H20O10	432.381		Emodin glucoside.mol	10.7666/d.d044120				432.106
大黄		大黄酚葡萄糖苷	chrysophanol glucoside	C21H20O9	416.382		chrysophanol glucoside.mol	10.7666/d.d044120				416.111
大黄		8-O-β-D-(6’-O-乙酰基)吡喃葡萄糖-大黄酚	8-O-β-D-(6’-O-acetyl) glucopyranosyl-chrysophanol	C22H22O10	458.419		8-O-β-D-(6’-O-acetyl) glucopyranosyl-chrysophanol.mol	10.7666/d.d044120				458.121
大黄		大黄酚-8-O-β-D葡萄糖苷	Chrysophanol-8-O-β-D-glucoside	C21H20O9	416.382	13241-28-6	Chrysophanol-8-O-β-D-glucoside.mol	10.7666/d.d044120				416.111
大黄		大黄素-1-O-β-D-葡萄糖苷	Emodin-1-O-β-D-glucoside	C21H20O10	432.381		Emodin-1-O-β-D-glucoside.mol	10.7666/d.d044120				432.106
大黄		大黄素-6-O-β-D-葡萄糖苷	Emodin-6-O-β-D-glucoside	C21H20O10	432.381		Emodin-6-O-β-D-glucoside.mol	10.7666/d.d044120				432.106
大黄		大黄素-8-O-β-D-葡萄糖苷	Emodin-8-O-β-D-glucoside	C21H20O10	432.381	23313-21-5	Emodin-8-O-β-D-glucoside.mol	10.7666/d.d044120				432.106
大黄		大黄素甲醚-8-O-β-D-葡萄糖苷	Physcion-8-O-β-D-glucoside	C22H22O10	446.408	1329-27-7	Physcion-8-O-β-D-glucoside.mol	10.7666/d.d044120				446.121
大黄		大黄素甲醚-8-O-β-D-龙胆双糖甙	Physcion-8-O-β-D-gentiobioside	C28H32O15	608.549		Physcion-8-O-β-D-gentiobioside.mol	10.7666/d.d044120				608.174
大黄		芦荟大黄素-8-O-β-D-葡萄糖苷	Aloe-emodin-8-O-β-D-glucoside	C21H20O10	432.381	33037-46-6	Aloe-emodin-8-O-β-D-glucoside.mol	10.7666/d.d044120				432.106
大黄		芦荟泻素双葡萄糖苷	Aloe-emodin diglucoside	C27H30O15	594.522		Aloe-emodin diglucoside.mol	10.7666/d.d044120				594.158
大黄		大黄酸-8-O-β-D-葡萄糖苷	Rhein-8-O-β-D-glucoside	C21H18O11	446.364		Rhein-8-O-β-D-glucoside.mol	10.7666/d.d044120				446.085
大黄		大黄酸二葡萄糖苷	Rhein diglucoside	C27H28O16	608.505		Rhein diglucoside.mol	10.7666/d.d044120				608.138
大黄		大黄酚-8-O-β-D-(6’-O-malonyl)-吡喃葡萄糖苷	Chrysophanol-8-O-β-D-(6’-O-malonyl)diglucoside	C24H22O12	502.428		Chrysophanol-8-O-β-D-(6’-O-malonyl)diglucoside.mol	10.7666/d.d044120				502.111
大黄		大黄二蒽酮A	rheidin A	C30H20O9	524.481		rheidin A.mol	10.7666/d.d044120				524.111
大黄		大黄二蒽酮B	rheidin B	C30H20O8	508.482		rheidin B.mol	10.7666/d.d044120				508.116
大黄		大黄二蒽酮C	rheidin C	C31H22O9	538.508		rheidin C.mol	10.7666/d.d044120				538.126
大黄		掌叶二蒽酮A	palmidin A	C30H22O8	510.498	17062-55-4	palmidin A.mol	10.7666/d.d044120				510.131
大黄		掌叶二蒽酮B	palmidin B	C30H22O7	494.499	17062-56-5	palmidin B.mol	10.7666/d.d044120				494.137
大黄		掌叶二蒽酮C	palmidin C	C30H22O7	494.499	17177-86-5	palmidin C.mol	10.7666/d.d044120				494.137
大黄		番泻苷A	sennoside A	C42H38O20	862.746	81-27-6	sennoside A.mol	10.7666/d.d044120				862.196
大黄		番泻苷B	sennoside B	C42H38O20	862.746	128-57-4	sennoside B.mol	10.7666/d.d044120				862.196
大黄		番泻苷C	sennoside C	C42H40O19	848.763	37271-16-2	sennoside C.mol	10.7666/d.d044120				848.216
大黄		番泻苷D	sennoside D	C42H40O19	848.763	37271-17-3	sennoside D.mol	10.7666/d.d044120				848.216
大黄		番泻苷E	sennoside E	C44H38O23	934.765	11137-63-6	sennoside E.mol	10.7666/d.d044120				934.18
大黄		番泻苷F	sennoside F	C44H38O23	934.765	52842-23-6	sennoside F.mol	10.7666/d.d044120				934.18
大黄		10-羟基药鼠李苷C	10-hydroxycascaroside C	C27H32O14	580.539		10-hydroxycascaroside C.mol	10.7666/d.d044120				580.179
大黄		10-羟基药鼠李苷D	10-hydroxycascaroside D	C27H32O14	580.539		10-hydroxycascaroside D.mol	10.7666/d.d044120				580.179
大黄			revandchinone-1	C33H44O5	520.71		revandchinone-1.mol	10.7666/d.d044120				520.319
大黄			revandchinone-2	C43H66O5	662.996		revandchinone-2.mol	10.7666/d.d044120				662.491
大黄			revandchinone-3	C37H54O5	578.834		revandchinone-3.mol	10.7666/d.d044120				578.397
大黄			revandchinone-4	C33H43O7	556.74		revandchinone-4.mol	10.7666/d.d044120				556.34
大黄		土大黄苷	rhaponticin	C21H24O9	420.414	155-58-8	rhaponticin.mol	10.7666/d.d044120				420.142
大黄		丹叶大黄素	rhapontigenin	C15H14O4	258.273	500-65-2	rhapontigenin.mol	10.7666/d.d044120				258.089
大黄		药鼠李苷D	cascaroside C	C27H32O13	564.54	53823-09-9	cascaroside C.mol	10.7666/d.d044120				564.184
大黄		药鼠李苷C	cascaroside D	C27H32O13	564.54	53861-35-1	cascaroside D.mol	10.7666/d.d044120				564.184
大黄		决明因	cassialoin	C21H22O9	418.398	N/A	cassialoin.mol	10.7666/d.d044120				418.126
大黄		番泻苷元	sennidin C	C30H20O9	524.481	5355-93-1	sennidin C.mol	10.7666/d.d044120				524.111
大黄		去氧土大黄苷	Deoxyrhaponticin	C21H24O8	404.415	30197-14-9	Deoxyrhaponticin.mol	10.7666/d.d044120				404.147
大黄		去氧丹叶大黄素	Desoxyrhapontigenin	C15H14O3	242.274	33626-08-3	Desoxyrhapontigenin.mol	10.7666/d.d044120				242.094
大黄		白皮杉醇	Piceatannol	C14H12O4	244.246	10083-24-6	Piceatannol.mol	10.7666/d.d044120				244.074
大黄		白皮杉醇 -3-O-β-D-葡萄糖苷	Piceatannol -3-O-β-D-glucopyranoside	C20H22O9	406.387	29884-49-9	Piceatannol -3-O-β-D-glucopyranoside.mol	10.7666/d.d044120				406.126
大黄		白皮杉醇 -3'-O-β-D-葡萄糖苷	Piceatannol-3’-O-β-D-glucopyranoside	C20H22O9	406.387		Piceatannol-3’-O-β-D-glucopyranoside.mol	10.7666/d.d044120				406.126
大黄		白皮杉醇 -3'-O-β-D-木吡喃糖苷	Piceatannol 3’-O-β-D-oxylopyranoside	C20H22O9	406.387		Piceatannol 3’-O-β-D-oxylopyranoside.mol	10.7666/d.d044120				406.126
大黄		白皮杉醇 -4'-O-β-D-葡萄糖苷	Piceatannol-4’-O-β-D-glucopyranoside	C20H22O9	406.387		Piceatannol-4’-O-β-D-glucopyranoside.mol	10.7666/d.d044120				406.126
大黄		白藜芦醇	Resveratrol	C14H12O3	228.247	501-36-0	Resveratrol.mol	10.7666/d.d044120				228.079
大黄		白藜芦醇-3-O-β-D-葡萄糖苷	resveratrol -3-O-β-D-glucopyranoside	C20H22O8	390.388	27208-80-6	resveratrol -3-O-β-D-glucopyranoside.mol	10.7666/d.d044120				390.131
大黄		白藜芦醇-4’-O-β-D-葡萄糖苷	resveratrol 4′-O-β-D-glucopyranoside	C20H22O8	390.388	38963-95-0	resveratrol 4′-O-β-D-glucopyranoside.mol	10.7666/d.d044120				390.131
大黄		白藜芦醇-4’-O-β-D-(6″-O-没食子酰基)-葡萄糖苷	resveratrol 4′-O-β-D- (6″-O-galloyl) -glucopyranoside	C27H26O12	542.493		resveratrol 4′-O-β-D- (6″-O-galloyl) -glucopyranoside.mol	10.7666/d.d044120				542.142
大黄			Rhapontigenin	C15H14O4	258.269	500-65-2	rhapontigenin.mol	10.7666/d.d044120				258.089
大黄			rhapontigenin 3′-O-β-D-glucopyranoside	C21H24O8	420.415	94356-22-6	rhapontigenin 3′-O-β-D-glucopyranoside.mol	10.7666/d.d044120				420.147
大黄			rhaponticin	C21H24O9	420.41	155-58-8	rhaponticin.mol	10.7666/d.d044120				420.142
大黄			rhaponticin 2″-O-gallate	C28H28O13	572.519	94356-24-8	rhaponticin 2″-O-gallate.mol	10.7666/d.d044120				572.153
大黄			rhaponticin 6″-O-gallate	C28H28O13	572.519	94356-23-7	rhaponticin 6″-O-gallate.mol	10.7666/d.d044120				572.153
大黄			rhaponticin 2″-O-p-coumarate	C30H30O11	566.559		rhaponticin 2″-O-p-coumarate.mol	10.7666/d.d044120				566.179
大黄			isorhapontigenin	C15H14O4	258.273	32507-66-7	isorhapontigenin.mol	10.7666/d.d044120				258.089
大黄			isorhapontin	C21H24O9	420.414	32727-29-0	isorhapontin.mol	10.7666/d.d044120				420.142
大黄		顺式-3, 5, 3′-三羟基-4′-甲氧基茋	cis-3, 5, 3′-trihydroxyl-4′-methoxystibene	C15H16O4	260.289		cis-3, 5, 3′-trihydroxyl-4′-methoxystibene.mol	10.7666/d.d044120				260.105
大黄			gnetin C	C28H22O6	454.478		gnetin C.mol	10.7666/d.d044120				454.142
大黄			Maximol A	C28H22O6	454.478		Maximol A.mol	10.7666/d.d044120				454.142
大黄			4-(4'-hydroxyphenyl)-2-butanone-4'-O-β-D-glucopyranoside	C16H22O7	326.345		4-(4'-hydroxyphenyl)-2-butanone-4'-O-β-D-glucopyranoside.mol	10.7666/d.d044120				326.137
大黄		4- (4′-羟基苯基) -2-丁酮-4′-O-β-D- (6″-O-没食子酰基) -吡喃葡萄糖苷	4-(4'-hydroxyphenyl)-2-butanone-4'-O-β-D-(6''-O-galloyl)-glucopyanoside	C23H26O11	478.45	59282-56-3	4-(4'-hydroxyphenyl)-2-butanone-4'-O-β-D-(6''-O-galloyl)-glucopyanoside.mol	10.7666/d.d044120				478.148
大黄		4- (4′-羟基苯基) -2-丁酮-4′-O-β-D- (2″-O-没食子酰基) -吡喃葡萄糖苷	4-(4'-hydroxyphenyl)-2-butanone-4'-O-β-D-(2''-O-galloyl)-glucopyanoside	C23H26O11	478.45		4-(4'-hydroxyphenyl)-2-butanone-4'-O-β-D-(2''-O-galloyl)-glucopyanoside.mol	10.7666/d.d044120				478.148
大黄		4- (4′-羟基苯基) -2-丁酮-4′-O-β-D- (2'',6″-O-没食子酰基) -吡喃葡萄糖苷	4-(4'-hydroxyphenyl)-2-butanone-4'-O-β-D-(2'',6''-O-galloyl)-glucopyanoside	C30H30O15	630.555		4-(4'-hydroxyphenyl)-2-butanone-4'-O-β-D-(2'',6''-O-galloyl)-glucopyanoside.mol	10.7666/d.d044120				630.158
大黄		4- (4′-羟基苯基) -2-丁酮-4′-O-β-D- (2″-O-没食子酰基-6″-O-桂皮酰基) -吡喃葡萄糖苷	4-(4'-hydroxyphenyl)-2-butanone-4'-O-β-D-(2''-O-galloyl-6''-O-cinnamoyl)-glucopyanoside	C32H32O12	608.596		4-(4'-hydroxyphenyl)-2-butanone-4'-O-β-D-(2''-O-galloyl-6''-O-cinnamoyl)-glucopyanoside.mol	10.7666/d.d044120				608.189
大黄		4- (4′-羟基苯基) -2-丁酮-4′-O-β-D- (2″-O-没食子酰基-6″-O-p-桂皮酰基) -吡喃葡萄糖苷	4-(4'-hydroxyphenyl)-2-butanone-4'-O-β-D-(2''-O-galloyl-6''-O-p-cinnamoyl)-glucopyanoside	C32H32O13	624.595		4-(4'-hydroxyphenyl)-2-butanone-4'-O-β-D-(2''-O-galloyl-6''-O-p-cinnamoyl)-glucopyanoside.mol	10.7666/d.d044120				624.184
大黄		3－（3’，5’-二羟基-反式-肉桂酰基）－5-羟基-△5－α-吡喃酮	3-(3’’,5’-dihydroxyl-trans-cinnamoyl)-5-hydroxy-Δ5-α-pyranone	C14H14O6	278.26		3-(3’’,5’-dihydroxyl-trans-cinnamoyl)-5-hydroxy-Δ5-α-pyranone.mol	10.7666/d.d044120				278.079
大黄		2,5-二甲基-7-羟基色酮	2,5-dimethyl-7-hydroxychromone	C11H10O3	190.198	38412-47-4	2,5-dimethyl-7-hydroxychromone.mol	10.7666/d.d044120				190.063
大黄		2-甲基-5-羟甲基-7-羟基色酮	2-methyl-5-acetonyl-7-hydroxychromone	C13H12O4	232.235	28955-30-8	2-methyl-5-acetonyl-7-hydroxychromone.mol	10.7666/d.d044120				232.074
大黄		2-甲基- 5-羧甲基- 7-羟基色原酮	2-methyl-5-carboxymethyl-7-hydroxychromone	C12H12O5	236.223		2-methyl-5-carboxymethyl-7-hydroxychromone.mol	10.7666/d.d044120				236.068
大黄		2-(2'一羟丙基) -5-甲基-7-羟基色原酮	2-(2’-hydroypropyl)-5-methyl-7-hydroxychromone	C13H14O4	234.251		2-(2’-hydroypropyl)-5-methyl-7-hydroxychromone.mol	10.7666/d.d044120				234.089
大黄			Aloesone-7-O-β-D-glucopyranoside	C19H22O9	394.376		Aloesone-7-O-β-D-glucopyranoside.mol	10.7666/d.d044120				394.126
大黄			2-methyl-5-(2’-oxe-4’-hydroxypentyl)-7-hydroxychromone-7-O-β-D-glucopyranoside	C21H26O10	438.429		2-methyl-5-(2’-oxe-4’-hydroxypentyl)-7-hydroxychromone-7-O-β-D-glucopyranoside.mol	10.7666/d.d044120				438.153
大黄		山奈酚	kaempferol	C15H10O6	286.239	520-18-3	kaempferol.mol	10.7666/d.d044120				286.048
大黄		山奈酚-3-O-鼠李糖苷	Kaempferol-3-O-rhamnoside	C21H20O10	432.381	482-39-3	Kaempferol-3-O-rhamnoside.mol	10.7666/d.d044120				432.106
大黄			Kaempferol-3-O-(2’,6’-di-O-rhamnopyranoyls)-β-D-galactopyranoside	C33H40O19	740.664		Kaempferol-3-O-(2’,6’-di-O-rhamnopyranoyls)-β-D-galactopyranoside.mol	10.7666/d.d044120				740.216
大黄			rutin	C27H30O16	610.521	153-18-4	rutin.mol	10.7666/d.d044120				610.153
大黄			vitexin	C21H20O10	432.381	3681-93-4	vitexin.mol	10.7666/d.d044120				432.106
大黄			Torachrysone-8-O-β-D-glucoside	C20H24O9	408.403	64032-49-1	Torachrysone-8-O-β-D-glucoside.mol	10.7666/d.d044120				408.142
大黄			Torachrysone-8-O-β-D-(6’-O-oxalyl)-glucopyranoside	C22H24O12	480.422		Torachrysone-8-O-β-D-(6’-O-oxalyl)-glucopyranoside.mol	10.7666/d.d044120				480.127
大黄			6-hydroxymusizin-8-O-β-D-glucopyranoside	C19H22O9	394.376	23566-96-3	6-hydroxymusizin-8-O-β-D-glucopyranoside.mol	10.7666/d.d044120				394.126
大黄		(+) -儿茶素	(+) -catechin	C15H1406	290.271	154-23-4	(+) -catechin.mol	10.7666/d.d044120				290.079
大黄		(+) -儿茶素 5-O-β-D-葡萄糖苷	(+) -catechin 5-O-β-D-glucopyranoside	C21H24O11	452.412		(+) -catechin 5-O-β-D-glucopyranoside.mol	10.7666/d.d044120				452.132
大黄		(+) -儿茶素 7-O-β-D-葡萄糖苷	(+) -catechin 7-O-β-D-glucopyranoside	C21H24O11	452.412		(+) -catechin 7-O-β-D-glucopyranoside.mol	10.7666/d.d044120				452.132
大黄		(+) -儿茶素 3'-O-β-D-葡萄糖苷	(+) -catechin 3′-O-β-D-glucopyranoside	C21H24O11	452.412		(+) -catechin 3′-O-β-D-glucopyranoside.mol	10.7666/d.d044120				452.132
大黄		(+) -儿茶素 4'-O-β-D-葡萄糖苷	(+) -catechin 4′-O-β-D-glucopyranoside	C21H24O11	452.412		(+) -catechin 4′-O-β-D-glucopyranoside.mol	10.7666/d.d044120				452.132
大黄		(+) -儿茶素 7,3'-二-O-β-D-葡萄糖苷	(+) -catechin 7, 3′-di-O-β-D-glucopyranoside	C27H34O16	614.553		(+) -catechin 7, 3′-di-O-β-D-glucopyranoside.mol	10.7666/d.d044120				614.185
大黄		(+) -儿茶素 5,3'-二-O-β-D-葡萄糖苷	(+) -catechin 5, 3′-di-O-β-D-glucopyranoside	C27H34O16	614.553		(+) -catechin 5, 3′-di-O-β-D-glucopyranoside.mol	10.7666/d.d044120				614.185
大黄		(+) -儿茶素 5,4'-二-O-β-D-葡萄糖苷	(+) -catechin 5, 4′-di-O-β-D-glucopyranoside	C27H34O16	614.553		(+) -catechin 5, 4′-di-O-β-D-glucopyranoside.mol	10.7666/d.d044120				614.185
大黄		(+) -儿茶素 3'-4'-二-O-β-D-葡萄糖苷	(+) -catechin 3′,4′-di-O-β-D-glucopyranoside	C27H34O16	614.553		(+) -catechin 3′,4′-di-O-β-D-glucopyranoside.mol	10.7666/d.d044120				614.185
大黄		(+) -儿茶素 8-C-β-D-葡萄糖苷	(+) -catechin 8-C-β-D-glucopyranoside	C21H24O11	452.412	105371-26-4	(+) -catechin 8-C-β-D-glucopyranoside.mol	10.7666/d.d044120				452.132
大黄		(+) -儿茶素 6-C-β-D-葡萄糖苷	(+) -catechin 6-C-β-D-glucopyranoside	C21H24O11	452.412	105371-27-5	(+) -catechin 6-C-β-D-glucopyranoside.mol	10.7666/d.d044120				452.132
大黄		原花青素B-1	procyanidin B-1	C30H26O12	578.526	20315-25-7	procyanidin B-1.mol	10.7666/d.d044120				578.142
大黄		原花青素B-1-3-O-没食子酸	procyanidin B-1-3-O-gallate	C37H30O16	730.631		procyanidin B-1-3-O-gallate.mol	10.7666/d.d044120				730.153
大黄		原花青素B-2	procyanidin B-2	C30H26O12	578.526	29106-49-8	procyanidin B-2.mol	10.7666/d.d044120				578.142
大黄		原花青素B-2 3'-O-没食子酸	procyanidin B-2 3′-O-gallate	C37H30O16	730.631		procyanidin B-2 3′-O-gallate.mol	10.7666/d.d044120				730.153
大黄		原花青素B-2 3,3'-二-O-没食子酸	procyanidin B-2 3, 3′-di-O-gallate	C44H34O20	882.736	79907-44-1	procyanidin B-2 3, 3′-di-O-gallate.mol	10.7666/d.d044120				882.164
大黄		原花青素C-1 3',3"-二-O-没食子酸	procyanidin C-1 3′, 3″-di-O-gallate	C59H46O26	1170.99	106533-61-3	procyanidin C-1 3′, 3″-di-O-gallate.mol	10.7666/d.d044120				1170.23
大黄		原花青素C-1 3,3',3"-三-O-没食子酸	procyanidin C-1 3, 3′, 3″-tri-O-gallate	C66H50O30	1323.1	106533-62-4	procyanidin C-1 3, 3′, 3″-tri-O-gallate.mol	10.7666/d.d044120				1322.24
大黄		表儿茶素-（4β→8）-表儿茶素-（4β→8）-儿茶素	epicatechin- (4β→8) -epicatechin- (4β→8) -catechin	C45H38O18	866.781		epicatechin- (4β→8) -epicatechin- (4β→8) -catechin.mol	10.7666/d.d044120				866.206
大黄		原花青素B-7	procyanidin B-7	C30H26O12	578.526	12798-59-3	procyanidin B-7.mol	10.7666/d.d044120				578.142
大黄		原花青素B-5 3,3'-二-O-没食子酸	procyanidin B-5 3, 3′-di-O-gallate	C44H34O20	882.736	106533-60-2	procyanidin B-5 3, 3′-di-O-gallate.mol	10.7666/d.d044120				882.164
大黄		原花青素B-5	procyanidin B-5	C30H26O12	578.526	12798-57-1	procyanidin B-5.mol	10.7666/d.d044120				578.142
大黄		表儿茶素-（4β→6）-表儿茶素-（4β→8）-表儿茶素	epicatechin- (4β→6) -epicatechin- (4β→8) -epicatechin	C45H38O18	866.781		epicatechin- (4β→6) -epicatechin- (4β→8) -epicatechin.mol	10.7666/d.d044120				866.206
大黄		原花青素B-3	procyanidin B-3	C30H26O12	578.526	23567-23-9	procyanidin B-3.mol	10.7666/d.d044120				578.142
大黄		原花青素B-3 7-O-β-D-葡萄糖苷	procyanidin B-3 7-O-β-D-glucopyranoside	C36H36O17	740.667		procyanidin B-3 7-O-β-D-glucopyranoside.mol	10.7666/d.d044120				740.195
大黄		原花青素B-4	procyanidin B-4	C30H26O12	578.526	29106-51-2	procyanidin B-4.mol	10.7666/d.d044120				578.142
大黄		原花青素B-4 3'-O-没食子酸	procyanidin B-4 3′-O-gallate	C37H30O16	730.631		procyanidin B-4 3′-O-gallate.mol	10.7666/d.d044120				730.153
大黄			epicatechin- (4β→6) -epicatechin- (4β→6) -epicatechin	C45H38O18	866.781		epicatechin- (4β→6) -epicatechin- (4β→6) -epicatechin.mol	10.7666/d.d044120				866.206
大黄			Arecatannin B1	C45H38O18	866.781	79763-28-3	Arecatannin B1.mol	10.7666/d.d044120				866.206
大黄			(-) -epicatechin 3-O-gallate	C22H18O10	442.376	1257-08-5	(-) -epicatechin 3-O-gallate.mol	10.7666/d.d044120				442.09
大黄			rhatannin	C10H13NO3	195.218	208-670-8	rhatannin.mol	10.7666/d.d044120				195.09
大黄		没食子酸	gallic acid	C7H6O5	170.12	149-91-7	gallic acid.mol	10.7666/d.d044120				170.022
大黄			6′-O-galloylsucrose	C19H26O15	494.402	115713-43-4	6′-O-galloylsucrose.mol	10.7666/d.d044120				494.127
大黄			4′-O-galloylsucrose	C19H26O15	494.402	115713-44-5	4′-O-galloylsucrose.mol	10.7666/d.d044120				494.127
大黄			6-O-galloylsucrose	C19H26O15	494.402	115731-15-2	6-O-galloylsucrose.mol	10.7666/d.d044120				494.127
大黄			1′-O-galloylsucrose	C19H26O15	494.402	115713-45-6	1′-O-galloylsucrose.mol	10.7666/d.d044120				494.127
大黄			2-O-galloylsucrose	C19H26O15	494.402	115713-46-7	2-O-galloylsucrose.mol	10.7666/d.d044120				494.127
大黄			1-O-galloyl-6-O-cinnamoyl-β-D-glucose	C22H22O11	462.407	115746-69-5	1-O-galloyl-6-O-cinnamoyl-β-D-glucose.mol	10.7666/d.d044120				462.116
大黄		1-O-没食子酰基-2-O-香豆-β-D-葡萄糖	1-O-galloyl-2-O-cinnamoyl-β-D-glucose	C22H22O11	462.407		1-O-galloyl-2-O-cinnamoyl-β-D-glucose.mol	10.7666/d.d044120				462.116
大黄		1, 6-二-O-没食子酰基-2-O-对香豆-β-D-葡萄糖	1, 6-di-O-galloyl-2-O-cinnamoyl-β-D-glucose	C29H26O15	614.512		1, 6-di-O-galloyl-2-O-cinnamoyl-β-D-glucose.mol	10.7666/d.d044120				614.127
大黄		1-O-没食子酰基-β-D-葡萄糖	1-O-galloyl-β-D-glucose	C13H16O10	332.261	13405-60-2	1-O-galloyl-β-D-glucose.mol	10.7666/d.d044120				332.074
大黄		2-O-没食子酰基-β-D-葡萄糖	2-O-galloyl-β-D-glucose	C13H16O10	332.261	N/A	2-O-galloyl-β-D-glucose.mol	10.7666/d.d044120				332.074
大黄		6-O-没食子酰基-β-D-葡萄糖	6-O-galloyl-β-D-glucose	C13H16O10	332.261	N/A	6-O-galloyl-β-D-glucose.mol	10.7666/d.d044120				332.074
大黄		1, 6-二-O-没食子酰基-β-D-葡萄糖	1, 6-di-O-galloyl-β-D-glucose	C20H20O14	484.366	N/A	1, 6-di-O-galloyl-β-D-glucose.mol	10.7666/d.d044120				484.085
大黄		2, 6-二-O-没食子酰基-β-D-葡萄糖	2, 6-di-O-galloyl-β-D-glucose	C20H20O14	484.366	N/A	2, 6-di-O-galloyl-β-D-glucose.mol	10.7666/d.d044120				484.085
大黄		1,2, 6-三-O-没食子酰基-β-D-葡萄糖	1, 2, 6-tri-O-galloyl-β-D-glucose	C27H24O18	636.471	79886-49-0	1, 2, 6-tri-O-galloyl-β-D-glucose.mol	10.7666/d.d044120				636.096
大黄			2-O-cinnamoyl-β-D-glucose	C15H18O7	310.302	94356-16-8	2-O-cinnamoyl-β-D-glucose.mol	10.7666/d.d044120				310.105
大黄			gallic acid-3-O-β-D- (6′-O-galloyl) -glucopyranoside	C20H20O14	484.366		gallic acid-3-O-β-D- (6′-O-galloyl) -glucopyranoside.mol	10.7666/d.d044120				484.085
大黄			gailic acid-4-O-β-D- (6′-O-galloyl) -glucopyranoside	C20H20O14	484.366		gailic acid-4-O-β-D- (6′-O-galloyl) -glucopyranoside.mol	10.7666/d.d044120				484.085
大黄			gallic acid-3-O-β-D-glucopyranoside	C13H16O10	332.261	91984-84-8	gallic acid-3-O-β-D-glucopyranoside.mol	10.7666/d.d044120				332.074
大黄			gallic acid-4-O-β-D-glucopyranoside	C13H16O10	332.261	N/A	gallic acid-4-O-β-D-glucopyranoside.mol	10.7666/d.d044120				332.074
大黄			1-O-galloylfructose	C13H16O10	332.261	94356-19-1	1-O-galloylfructose.mol	10.7666/d.d044120				332.074
大黄			1-O-galloylglycerol	C10H12O7	244.199	87087-60-3	1-O-galloylglycerol.mol	10.7666/d.d044120				244.058
大黄			Musizin-8-O-β-D-Glucoside	C19H22O8	378.377		Musizin-8-O-β-D-Glucoside.mol	10.7666/d.d044120				378.131
大黄			Diacerein	C19H12O8	368.294	13739-02-1	Diacerein.mol	10.3390/molecules23061447				368.053
大黄			4'-Methoxyresveratrol	C15H14O3	242.27	33626-08-3	4'-Methoxyresveratrol.mol	10.3390/molecules23061447				242.094
大黄			Raspberry ketone	C10H12O2	164.201	5471-51-2	Raspberry ketone.mol	10.1021/acs.chemrestox.7b00006				164.084
大黄			Rosin	C15H20O6	296.316		Rosin.mol	10.1016/j.jep.2019.112073				296.126
大黄			Rhodionin	C21H20O11	448.377	85571-15-9	Rhodionin.mol	10.3390/molecules171011484				448.101
大黄			sennidin B	C30H18O10	538.458		sennidin B.mol	10.1128/AEM.60.3.1041-1043.1994				538.090027
大黄			sennidin A	C30H18O10	538.458		sennidin A.mol	10.18632/oncotarget.1728				538.090027
大黄			4-Hydroxybenzoic acid	C7H6O3	138.121	99-96-7	4-Hydroxybenzoic acid.mol	10.18632/oncotarget.1728				138.032
